# Supplementary material for: Proteomics Analysis with a Nano Random Forest Approach Reveals Novel Functional Interactions Regulated by SMC Complexes on Mitotic Chromosomes
Source: PubMed Central journal article supplement (PMC4974353; doi:10.1074/mcp.m116.057885), 2016-05-26
Supplement: 10.1074_M116.057885_mcp.M116.057885-1.pdf [file 10.1074_M116.057885_mcp.M116.057885-1.pdf]

## Supplemental Information

**Figure S1.** Nucleosome-spacing assay of isolated wild-type and SMC2<sup>OFF</sup> chromosomes. The assay was performed in the presence of ~3 µg (OD<sub>260</sub> = 0.06) of chromosomal DNA. Wild-type chromosome containing 0, 0.5, 1, 2, or 5 µg micrococcal nuclease (lanes 1–5). SMC2<sup>OFF</sup> chromosome containing 0, 0.5, 1, 2, or 5 µg micrococcal nuclease (lanes 6–10)

**Figure S2.** (A, E) Experimental design of proteomics analysis using (A) SMC2, CAP-H, or CAP-D3 knockout cells and (E) Scc1 or SMC5 CAP-D3 knockout cells. (B) SDS-PAGE gel stained with Coomassie brilliant blue and immunoblot analyses of the proteins targeted for depletion in isolated mitotic chromosomes from SMC2<sup>OFF</sup> or CAP-D3<sup>OFF</sup> cells. (C, D, F) Growth curves of CAP-G<sup>OFF</sup> (C), CAP-D3<sup>OFF</sup> (D), or SMC5<sup>OFF</sup> (F) cells. The cell types are labeled in the left box (Wild type, -Doxycycline (ON), or +Doxycycline (OFF)).

**Figure S3.** Comparison between the results from biological replicates in SMC2 (A), CAP-H (B), CAP-D3 (C), Scc1 (D), and SMC5 (E) KO cells. The red number for each comparison indicates the Pearson correlation coefficient.

**Figure S4.** The receiver operating characteristic (ROC) curves and the area under the ROC curve (AUC) of all nanoRF analyses in this study. The AUC values indicated in bold font are over 0.8.

**Figure S5.** Entire heat map, shown in Fig. 7A, depicting the combined results of 5,058 proteins from nanoRF targeting condensin, condensin I, condensin II, cohesin, SMC5/6, CPC, histones, CCAN, Nup-Ran complexes, kinetochore, chromosomal scaffolds, and ribosomal proteins. The 8 classified branches are indicated with different colors, and the branches are separated into 4 classes (a–d) on the right.

**Table S1.** List of all identified proteins

**Table S2.** Mitotic index measurement of siRNA knockdown in HeLa cells.

Log2 mitotic index (MI), standard deviation (SD), and p-value (p) are shown. Bold numbers indicate p values that are <0.05.

**Table S3.** The orthologs of knockdown targets and level of amino acid-sequence homology between the chicken and human proteins

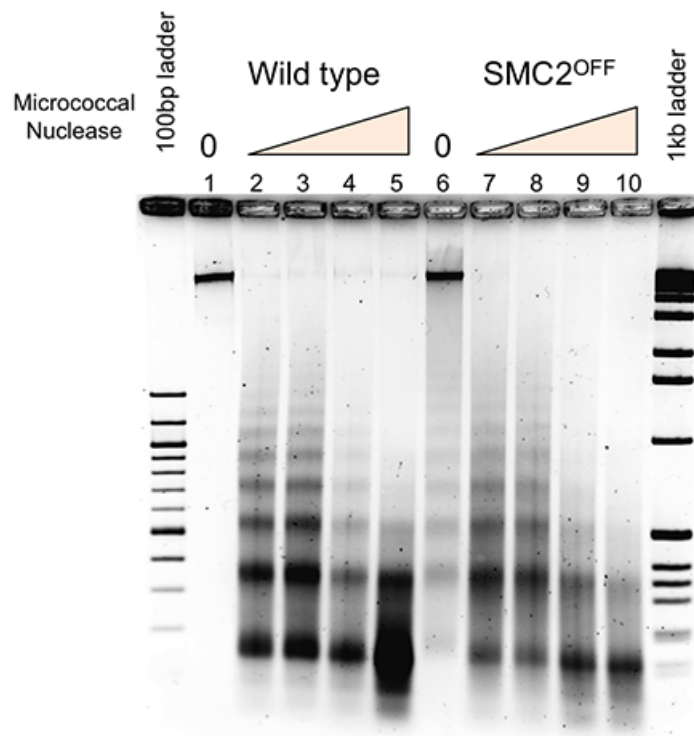

Fig. S1

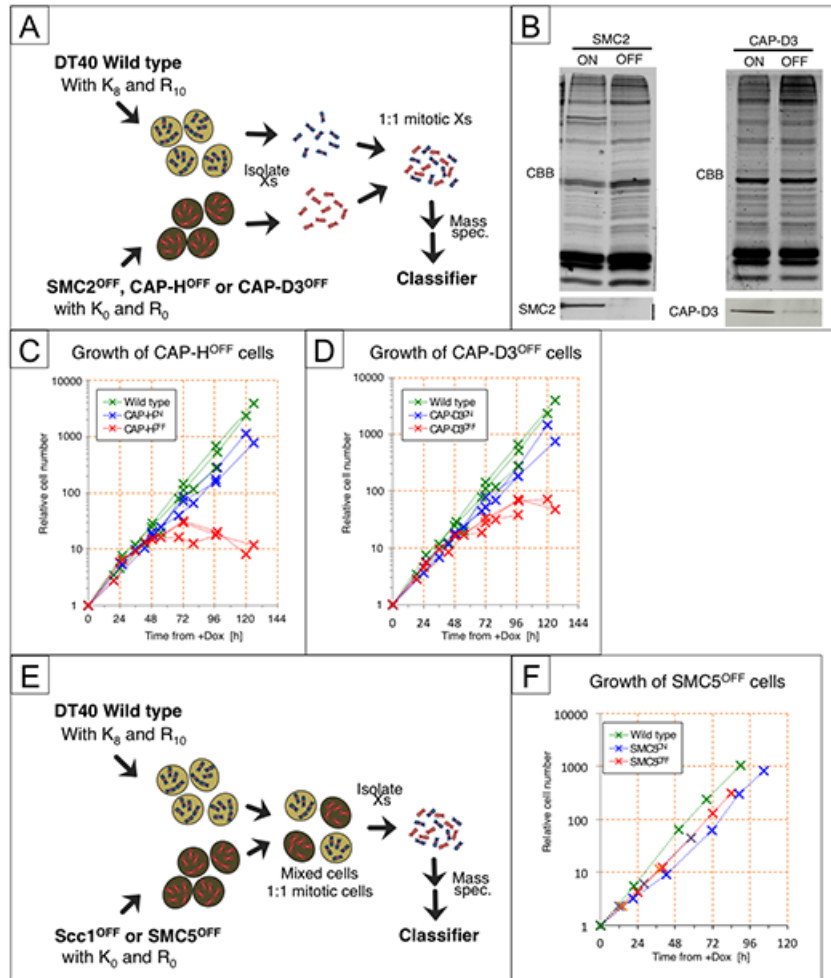

Fig. S2

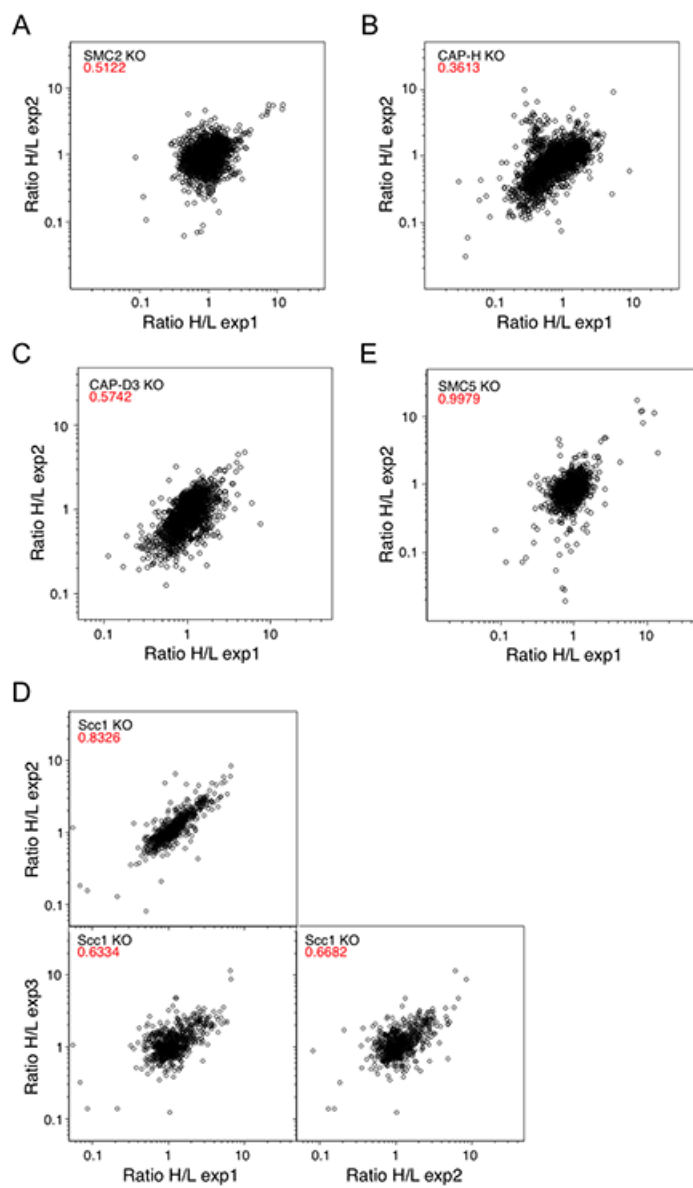

Fig. S3

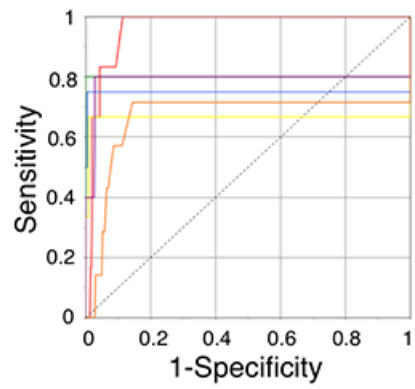

|                                | <u>AUC</u>          |
|--------------------------------|---------------------|
| — Chromosome Passenger Complex | <b><u>0.962</u></b> |
| — Condensin I&II               | <b><u>0.749</u></b> |
| — Condensin I                  | <b><u>0.800</u></b> |
| — Condensin II                 | <b><u>0.664</u></b> |
| — Cohesin                      | <b><u>0.789</u></b> |
| — SMC5/6                       | <b><u>0.661</u></b> |
| - - - y=x                      |                     |

Fig. S4

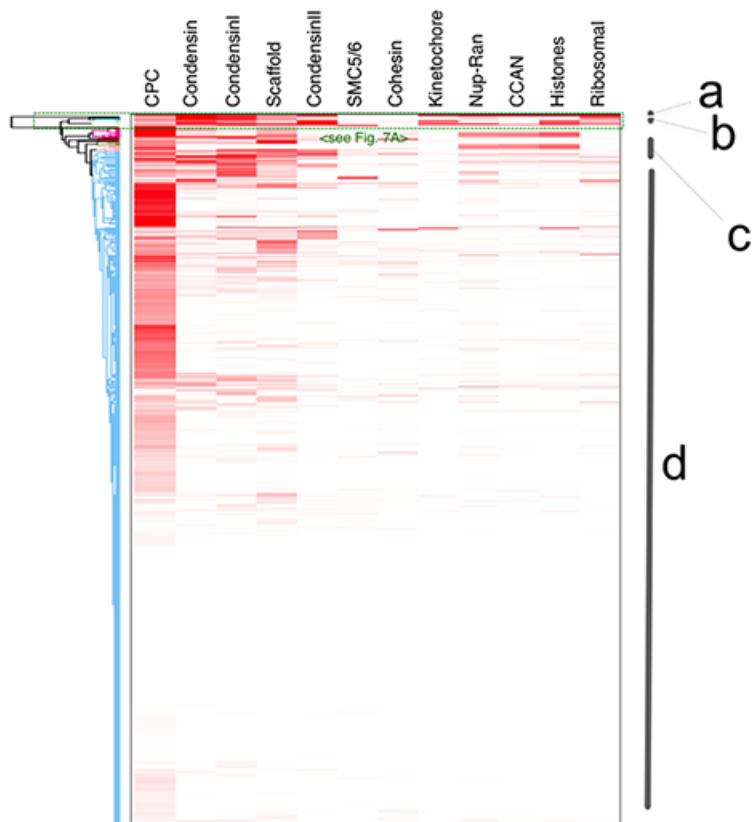

Fig. S5

**Table S2 Mitotic index measurement of siRNA knockdown in HeLa cells.**

Log2 mitotic index (MI), standard deviation (SD), and p-value (p) are shown. Bold number indicate < 0.05 in p-value.

|          | No treatment |      |              | Nocodazole treatment |      |              | Taxol treatment |      |              |
|----------|--------------|------|--------------|----------------------|------|--------------|-----------------|------|--------------|
|          | MI           | SD   | p value      | MI                   | SD   | p value      | MI              | SD   | p value      |
| Control  | 0            | 0    | -            | 0                    | 0    | -            | 0               | 0    | -            |
| PPP2R5C  | 0.03         | 0.25 | 0.847        | -0.14                | 0.12 | 0.165        | 0.10            | 0.10 | 0.208        |
| PHF2     | -0.10        | 0.09 | 0.190        | 0.04                 | 0.23 | 0.764        | -0.15           | 0.17 | 0.258        |
| KIF20A   | 0.18         | 0.14 | 0.156        | 0.13                 | 0.20 | 0.385        | -0.08           | 0.22 | 0.579        |
| C15orf23 | 0.38         | 0.14 | <b>0.042</b> | 0.14                 | 0.01 | <b>0.003</b> | -0.11           | 0.31 | 0.588        |
| PPP2R5A  | -0.07        | 0.08 | 0.236        | -0.11                | 0.05 | 0.068        | 0.00            | 0.10 | 0.984        |
| MLL      | 0.02         | 0.17 | 0.882        | -0.06                | 0.12 | 0.505        | -0.06           | 0.18 | 0.613        |
| SMARCA1  | 1.22         | 0.64 | 0.081        | -0.46                | 0.30 | <b>0.042</b> | -0.29           | 0.16 | 0.089        |
| PPP2R5D  | -0.11        | 0.46 | 0.724        | -0.19                | 0.10 | 0.072        | -0.18           | 0.11 | 0.102        |
| VRK1     | 0.82         | 0.44 | 0.084        | -0.14                | 0.13 | 0.215        | -0.06           | 0.12 | 0.485        |
| CISD2    | 0.17         | 0.26 | 0.378        | 0.04                 | 0.18 | 0.725        | 0.03            | 0.02 | 0.121        |
| CYP51A1  | -0.24        | 0.22 | 0.195        | -0.12                | 0.13 | 0.266        | -0.28           | 0.27 | 0.214        |
| ACO1     | 0.36         | 0.06 | <b>0.009</b> | -0.42                | 0.13 | <b>0.023</b> | -0.18           | 0.16 | 0.204        |
| LNPEP    | -0.14        | 0.05 | <b>0.047</b> | -0.11                | 0.17 | 0.386        | -0.15           | 0.13 | 0.194        |
| GTSE1    | 0.06         | 0.06 | 0.249        | 0.01                 | 0.02 | 0.468        | -0.23           | 0.11 | 0.068        |
| PPP2R2A  | -0.02        | 0.08 | 0.730        | -0.44                | 0.25 | <b>0.033</b> | -0.29           | 0.18 | 0.106        |
| ZNF512B  | 0.08         | 0.15 | 0.423        | 0.29                 | 0.34 | 0.303        | 0.09            | 0.04 | 0.066        |
| PTPN6    | 0.52         | 0.23 | 0.061        | -0.45                | 0.31 | <b>0.040</b> | -0.36           | 0.08 | <b>0.015</b> |
| NNT      | -0.09        | 0.36 | 0.709        | -0.17                | 0.03 | 0.008        | -0.13           | 0.12 | 0.201        |
| CCDC99   | 1.47         | 0.19 | <b>0.006</b> | -0.06                | 0.23 | 0.754        | -0.11           | 0.11 | 0.234        |
| AICDA    | -0.06        | 0.24 | 0.696        | 0.06                 | 0.20 | 0.625        | -0.04           | 0.04 | 0.287        |
| INTS8    | -0.26        | 0.36 | 0.333        | -0.03                | 0.18 | 0.849        | -0.27           | 0.21 | 0.157        |
| SNX9     | -0.12        | 0.40 | 0.655        | -0.27                | 0.26 | 0.185        | -0.20           | 0.20 | 0.221        |
| CCNB3    | 0.23         | 0.29 | 0.306        | 0.07                 | 0.02 | <b>0.023</b> | 0.04            | 0.08 | 0.504        |
| CXorf57  | 0.09         | 0.19 | 0.514        | 0.16                 | 0.21 | 0.305        | -0.11           | 0.16 | 0.366        |
| HMGXB4   | 0.10         | 0.10 | 0.233        | -0.02                | 0.08 | 0.800        | -0.09           | 0.11 | 0.292        |
| BACH2    | 0.08         | 0.21 | 0.582        | 0.04                 | 0.03 | 0.129        | 0.04            | 0.10 | 0.546        |
| ZFC3H1   | 0.19         | 0.09 | 0.066        | -0.25                | 0.07 | <b>0.020</b> | -0.03           | 0.07 | 0.488        |
| RanBP2   | -0.11        | 0.09 | 0.160        | -0.12                | 0.12 | 0.400        | -0.30           | 0.16 | 0.160        |
| Ska3     | 3.80         | 1.12 | 0.028        | 0.37                 | 0.02 | <b>0.001</b> | 0.21            | 0.04 | <b>0.014</b> |
| Mad2     | -1.20        | 0.69 | 0.096        | -1.51                | 0.22 | <b>0.002</b> | -1.44           | 0.57 | <b>0.048</b> |



**Table S3** The orthologues for knockdown targets and level of amino-acids sequential homology between chicken and human

| Acc (Chicken) | Acc (Human) | Gene Symbol | Gene Acc (Human) | Homology identity (%) |
|---------------|-------------|-------------|------------------|-----------------------|
| Q5F3C6        | Q13362      | PPP2R5C     | NM_178588        | 94.847                |
| F1NVY2        | O75151      | PHF2        | NM_005392        | 79.473                |
| E1C5A3        | Q15172      | PPP2R5A     | NM_006243        | 91.224                |
| F1NET5        | Q03164      | MLL         | NM_005933        | 72.142                |
| F1P3Q4        | P28370      | SMARCA1     | NM_139035        | 85.327                |
| F1P090        | Q14738      | PPP2R5D     | NM_006245        | 89.448                |
| F1NDK1        | Q99986      | VRK1        | NM_003384        | 69.082                |
| R4GLS1        | Q8N5K1      | CISD2       | NM_001008388     | 94.815                |
| F1P0L8        | Q16850      | CYP51A1     | NM_000786        | 77.381                |
| F1NY25        | P21399      | ACO1        | NM_002197        | 87.514                |
| F1NNE7        | Q9UIQ6      | LNPEP       | NM_175920        | 67.122                |
| F1NIS1        | Q9NYZ3      | GTSE1       | NM_016426        | 30.485                |
| F1NBJ2        | P63151      | PPP2R2A     | NM_002717        | 97.357                |
| E1BVT6        | Q96KM6      | ZNF512B     | NM_020713        | 21.306                |
| F1N843        | P29350      | PTPN6       | NM_080548        | 79.605                |
| E1C6A1        | Q13423      | NNT         | NM_182977        | 88.582                |
| E1BW90        | Q96EA4      | CCDC99      | NM_017785        | 57.903                |
| E1BVI0        | Q9GZX7      | AICDA       | NM_020661        | 89.899                |
| E1BUT6        | Q75QN2      | INTS8       | NM_017864        | 89.447                |
| E1BTY4        | Q9Y5X1      | SNX9        | NM_016224        | 83.775                |
| P39963        | Q8WWL7      | CCNB3       | NM_033670        | 14.204                |
| F1NID1        | Q6NSI4      | CXorf57     | NM_018015        | 40.704                |
| E1C640        | Q9UGU5      | HMGXB4      | NM_001003681     | 69.421                |
| E1BZR5        | Q9BYV9      | BACH2       | NM_021813        | 79.097                |
| E1C1R6        | O60293      | ZFC3H1      | NM_144982        | 72.361                |
| F1NLI8        | O95235      | KIF20A      | NM_005733        | 68.147                |
| F1NIG4        | Q9Y448      | C15orf23    | NM_033286        | 27.660                |
